# Supplementary material for: Computational Study of the Solid-State Incorporation of Sn(II) Acetate into Zeolite β
Source: PubMed Central journal article supplement (PMC10544035; doi:10.1021/acs.jpcc.3c02679), 2023-09-15
Supplement: jp3c02679_si_001.pdf [file jp3c02679_si_001.pdf]

Supporting Information

## Computational Study of the Solid-State

## Incorporation of Sn(II) Acetate into Zeolite $\beta$

*Owain T. Beynon<sup>1</sup>, Alun Owens<sup>1</sup>, Giulia Tarantino<sup>2</sup>, Ceri Hammond<sup>2</sup>, Andrew J. Logsdail<sup>1\*</sup>*

1. Cardiff Catalysis Institute, Cardiff University, Park Place, Cardiff, CF10 3AT, Wales, UK

2. Department of Chemical Engineering, Imperial College London, London, SW7 2AZ, UK

\*LogsdailA@cardiff.ac.uk

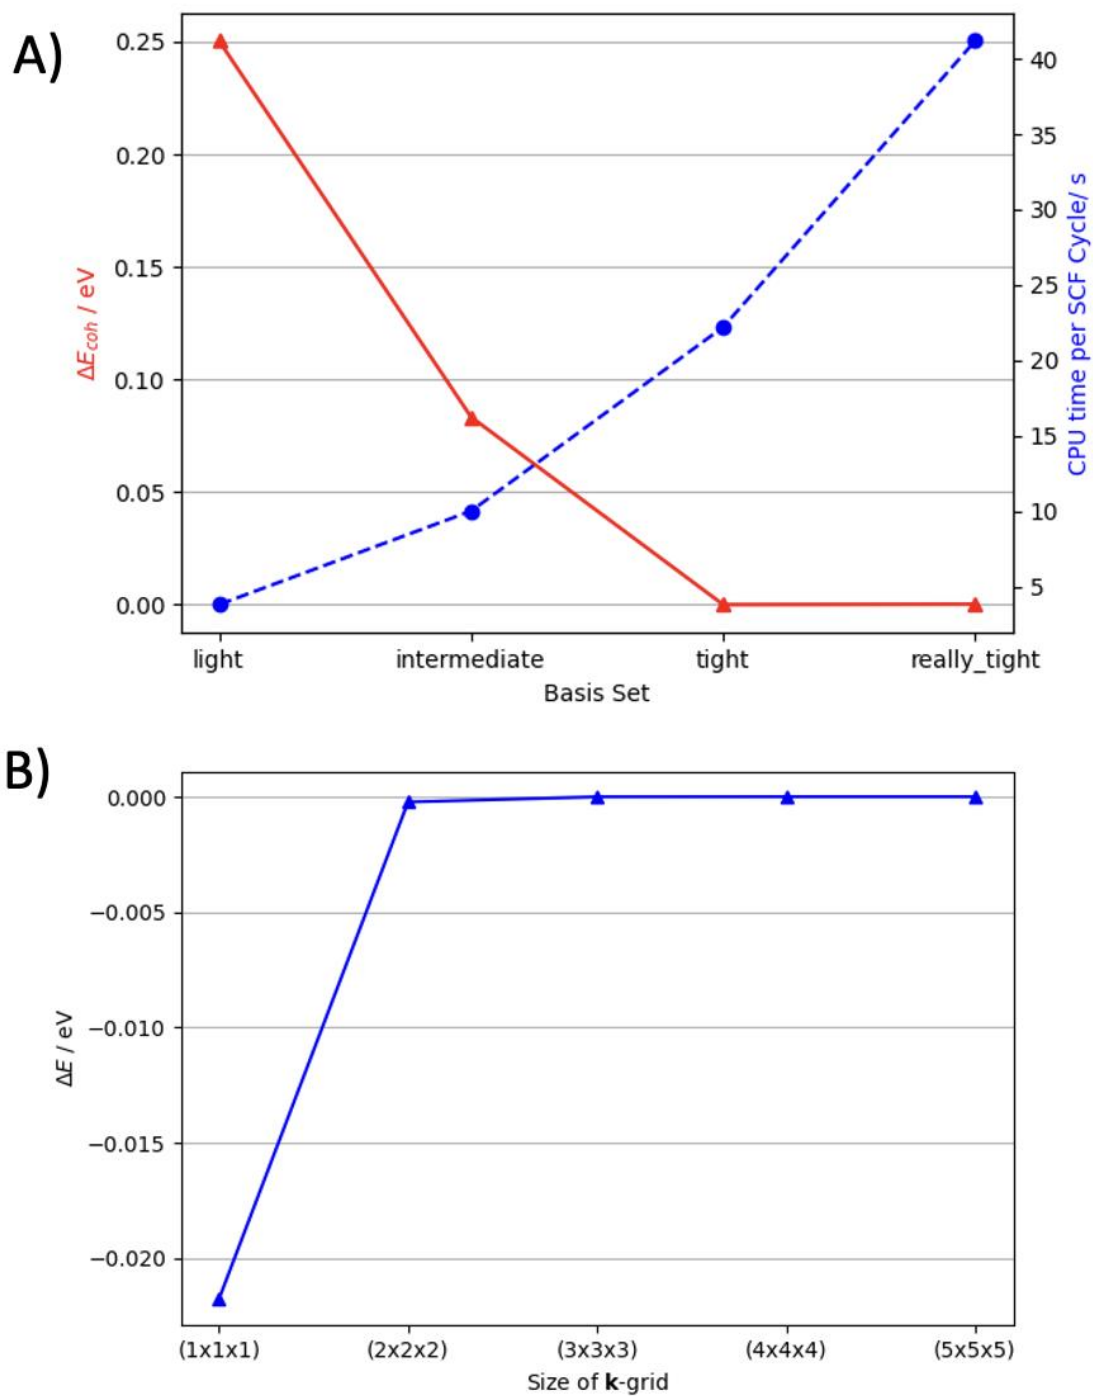

**Figure S1.** A: K-grid energies for relaxed BEA unit cells, with the difference in energy between the lowest value and all others reported as  $\Delta E / \text{eV}$ . B: Difference in cohesive energy ( $\Delta E_{coh} / \text{eV}$ ) for forming BEA as a function of basis set size and CPU time per SCF cycle.

**Table S1:** Comparison of exchange-correlation functionals for the optimisation of the BEA unit cell, with resultant lattice parameters  $a$ ,  $b$ , and  $c$  (Å).

|                                | $a$    | $B$    | $c$    |
|--------------------------------|--------|--------|--------|
| <i>Experiment</i> <sup>1</sup> | 12.632 | 12.632 | 26.186 |
| <b>PW-LDA</b>                  | 12.372 | 12.372 | 26.231 |
| <b>BLYP</b>                    | 12.784 | 12.784 | 26.843 |
| <b>PBE</b>                     | 12.680 | 12.680 | 26.644 |
| <b>PBE + TS</b>                | 12.450 | 12.450 | 26.484 |
| <b>PBE + MBD</b>               | 12.526 | 12.526 | 26.424 |
| <b>PBEsol</b>                  | 12.551 | 12.551 | 26.450 |
| <b>PBEsol + TS</b>             | 12.467 | 12.467 | 26.406 |
| <b>B3LYP</b>                   | 12.683 | 12.683 | 26.630 |
| <b>PBE0</b>                    | 12.587 | 12.587 | 26.444 |
| <b>HF</b>                      | 12.582 | 12.582 | 26.484 |

A)

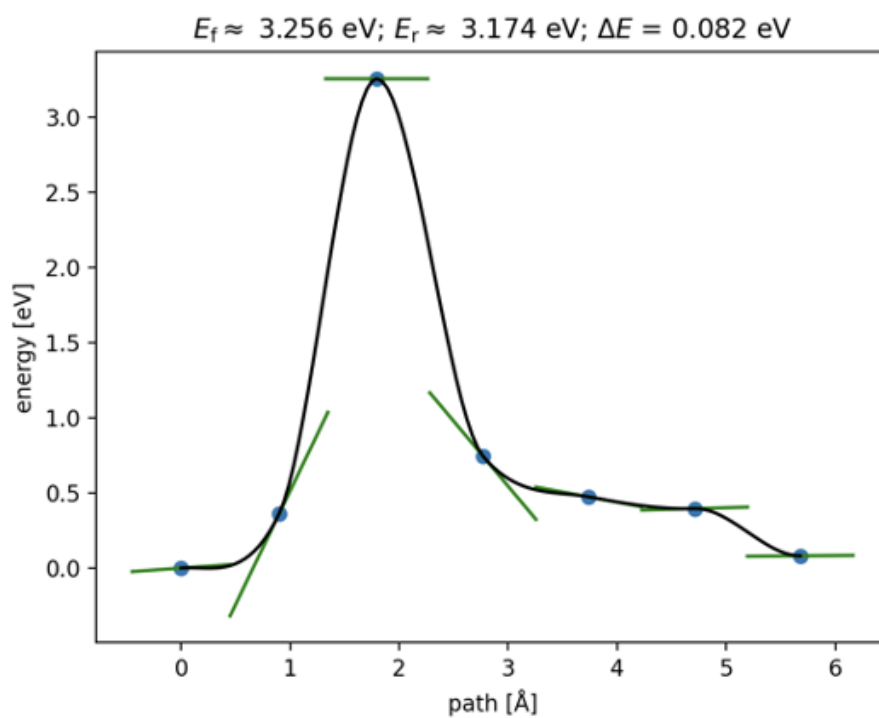

B)

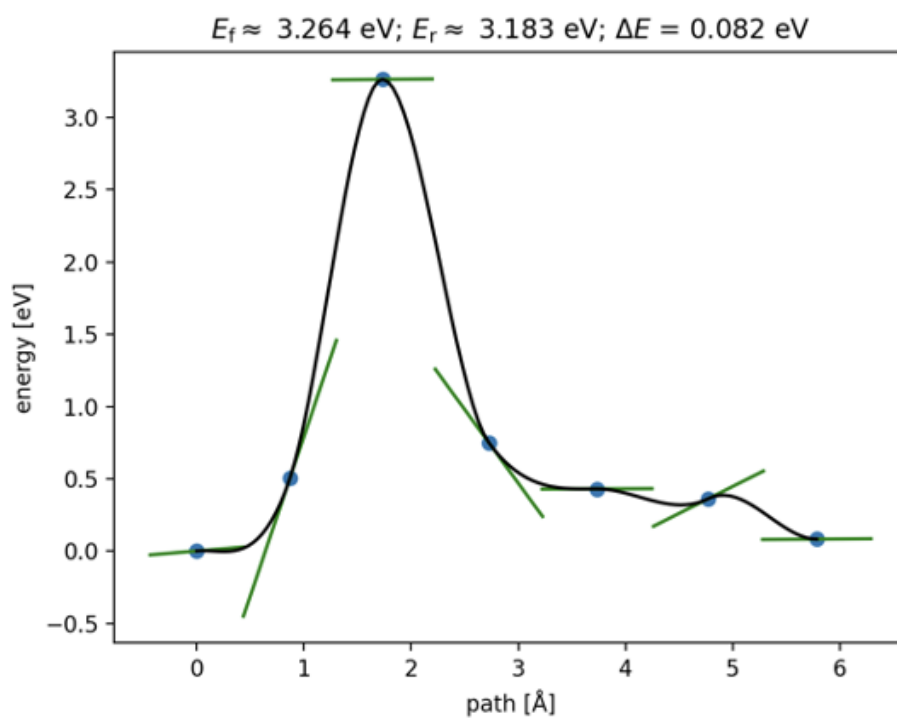

**Figure S2.** ML-NEB pathway for Sn(II) to Sn(IV) oxidation via H<sub>2</sub> abstraction as calculated with periodic DFT. A: Convergence criteria set to  $f_{\text{max}} = 0.01 \text{ eV/\AA}$  uncertainty = 0.05 eV. B: Convergence criteria set to  $f_{\text{max}} = 0.05 \text{ eV/\AA}$  uncertainty = 0.05 eV.

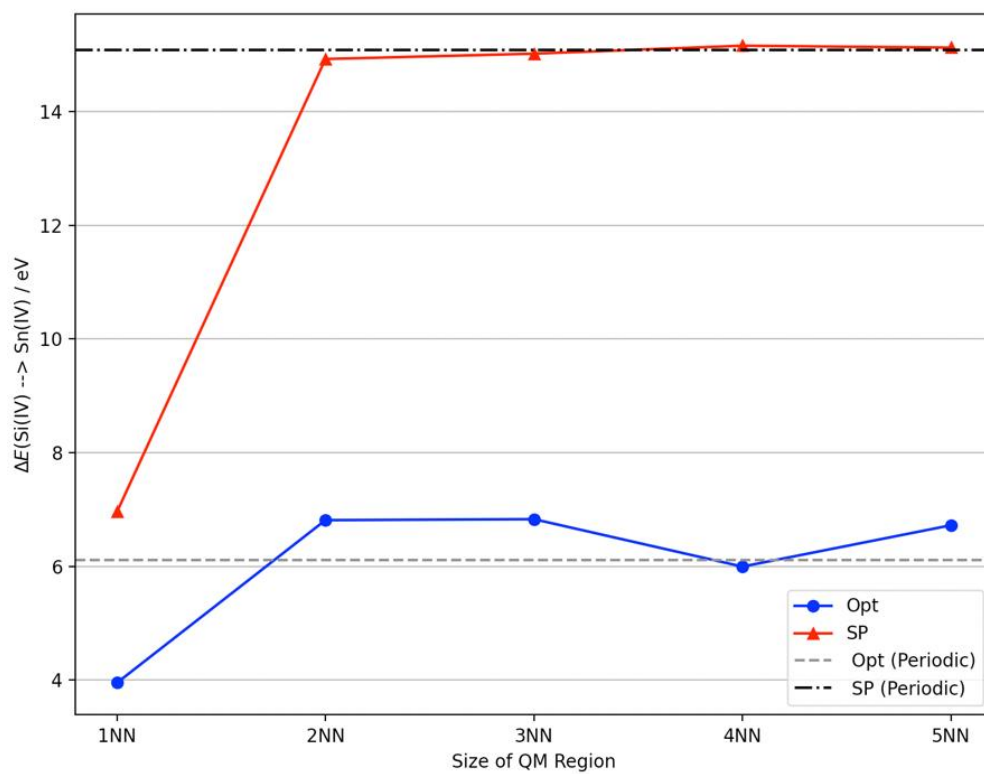

**Figure S3.** Plot of increasing size for QM region, from first to fifth nearest neighbour vs energy for single point calculations (SP) and geometry optimisation (Opt) of the oxidation of Sn(II) to Sn(IV). Energies of equivalent periodic calculations are also given as guide to convergence.

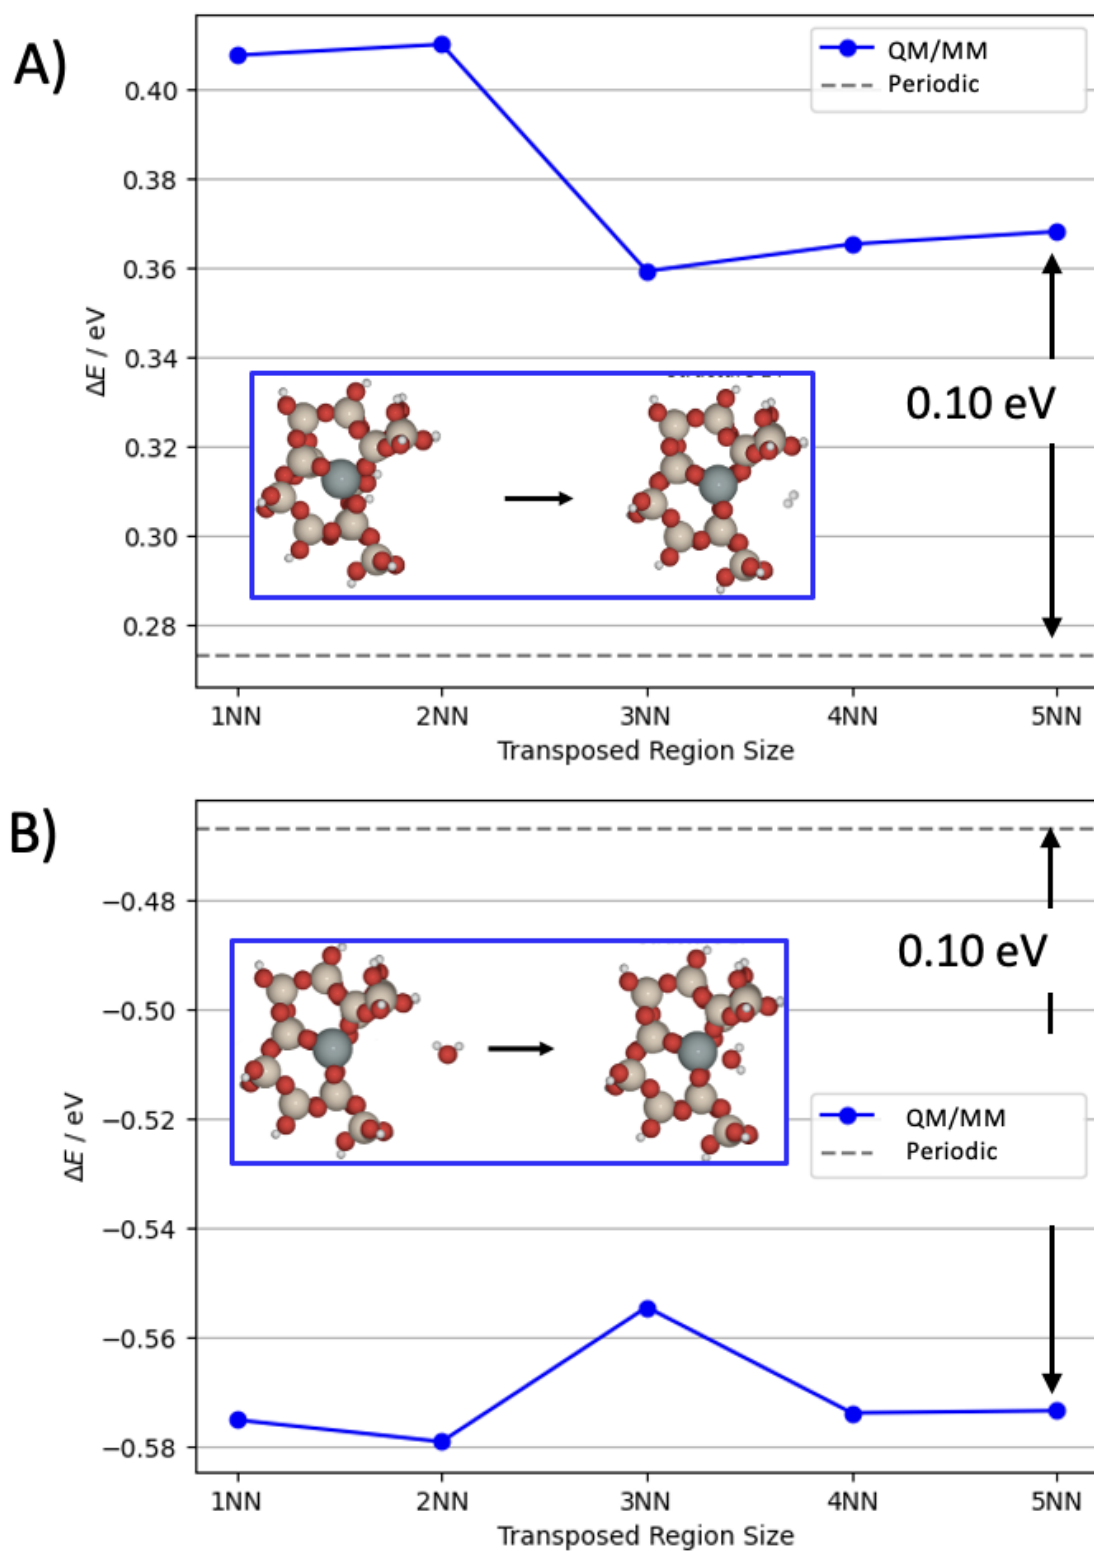

**Figure S4:** Plot of increasing size for transposed region from periodic models, from first to fifth nearest neighbour vs energy of geometry optimisation for A: oxidation of Sn(II) to Sn(IV). B: Adsorption of H<sub>2</sub>O on Sn(IV). Energies of equivalent periodic calculations are also given as guide to convergence. Insets: visual representation of the structures for the processes.

**Table S2:** BSSE calculated for bidentate Sn(II) acetate in deAl-BEA for PBEsol+TS, PBE0+TS, and MP2.

| Method    | PBEsol+TS | PBE0+TS | MP2   |
|-----------|-----------|---------|-------|
| BSSE / eV | -0.03     | -0.04   | -0.06 |

**Table S3.** Comparison of Sn-O<sub>x</sub> distances of Sn(II) acetate optimised with PBEsol+TS and experiment. All distances are reported in Angstrom (Å).

|                   | PBEsol+TS                                                                           | Experiment <sup>2</sup> |
|-------------------|-------------------------------------------------------------------------------------|-------------------------|
| Geometry          | 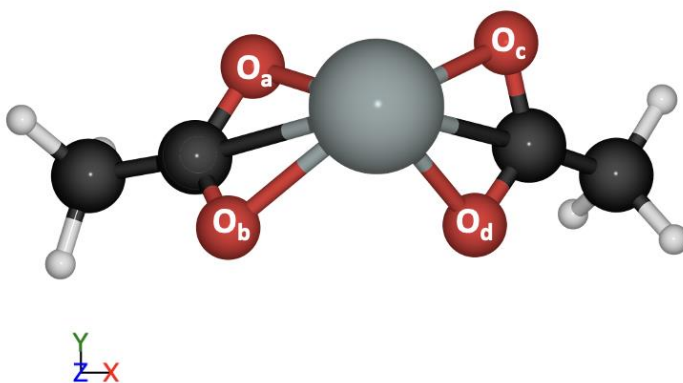 |                         |
| Sn-O <sub>a</sub> | 2.21                                                                                | 2.19                    |
| Sn-O <sub>b</sub> | 2.33                                                                                | 2.34                    |
| Sn-O <sub>c</sub> | 2.21                                                                                | 2.19                    |
| Sn-O <sub>d</sub> | 2.33                                                                                | 2.34                    |

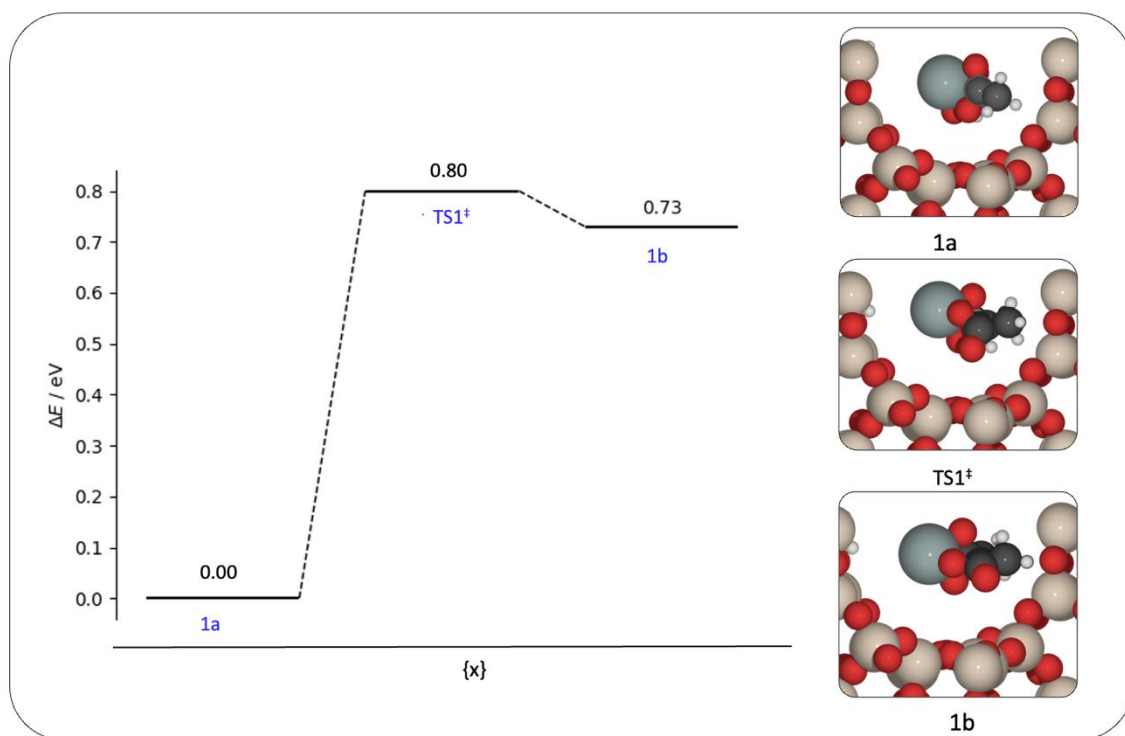

**Figure S5.** Graph of the reaction energies ( $\Delta E$ ) and kinetic barriers ( $E_{act}$ ) for conversion between bidentate (1) and monodentate (1b) Sn(II) acetate within the BEA pore, as calculated with periodic DFT. Insets: visual representation of the structural intermediates, with structure numbers as labelled. The red, beige, white, black, and grey atoms represent O, Si, H, C, and Sn, respectively.



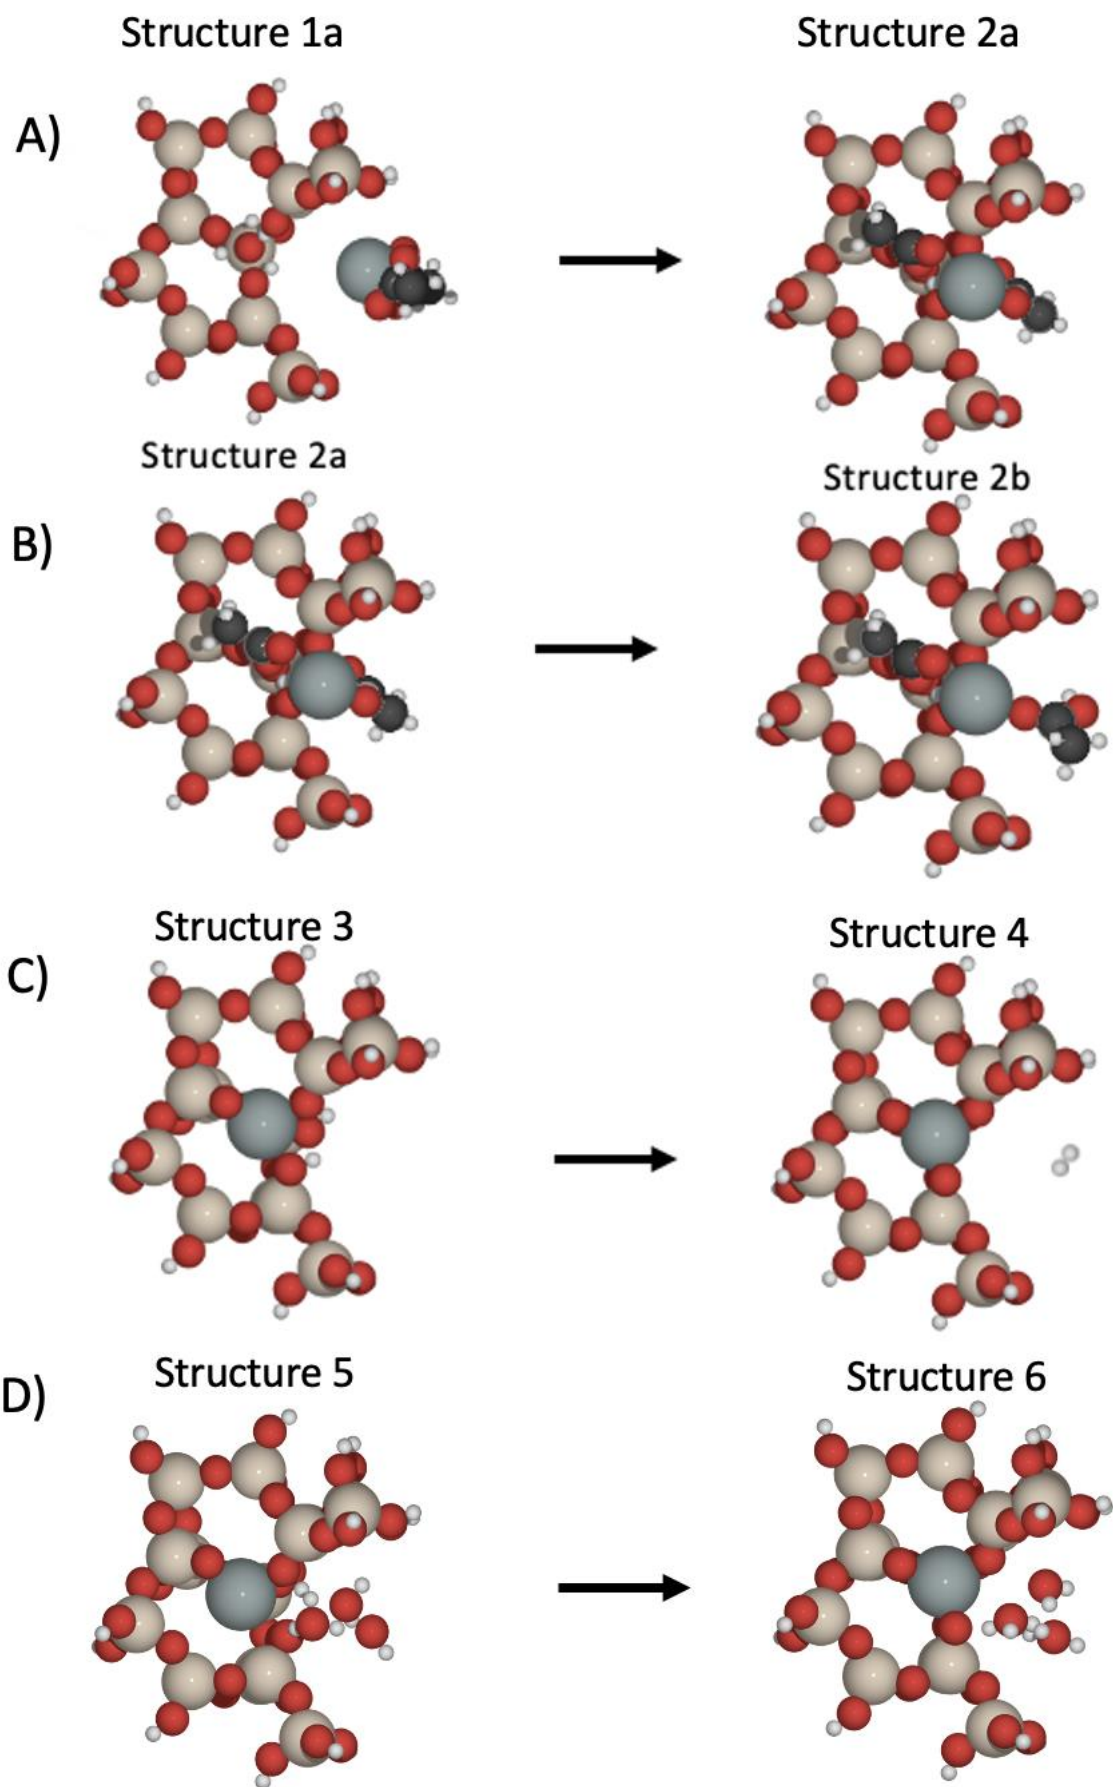

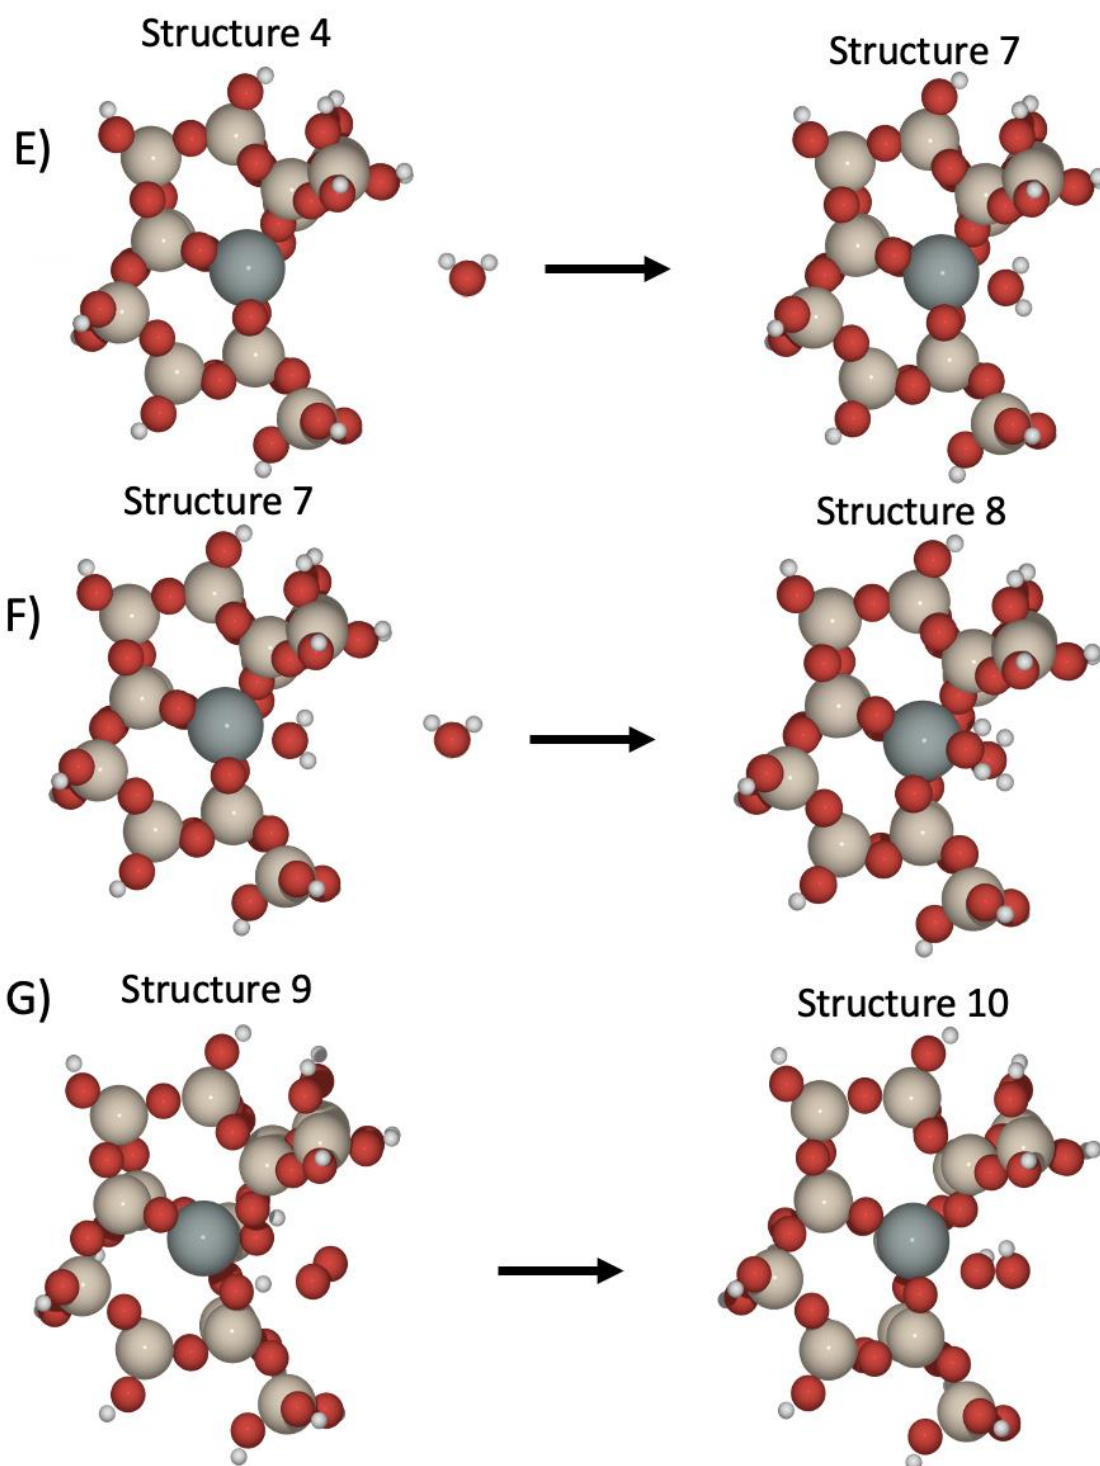

**Figure S6.** QM regions of calculations conducted with QM/MM methodology for stages in SSI and Sn-BEA synthesis; A:  $1a \rightarrow 2a$  B:  $2a \rightarrow 2b$ . C:  $3 \rightarrow 4$ . D:  $5 \rightarrow 6$ . E:  $4 \rightarrow 7$ . F:  $7 \rightarrow 8$ . G:  $9 \rightarrow 10$ . The red, beige, white, black, and grey atoms represent O, Si, H, C, and Sn, respectively.

**Table S4.**  $\Delta E$  (in eV) of processes as displayed in Figure S6 calculated with QM/MM.

| Process             | QM Method   |           |       |
|---------------------|-------------|-----------|-------|
|                     | PBEsol + TS | PBE0 + TS | MP2   |
| 1a $\rightarrow$ 2a | -1.47       | -1.59     | -3.21 |
| 2a $\rightarrow$ 2b | 0.46        | 0.12      | -0.04 |
| 3 $\rightarrow$ 4   | 0.39        | 0.21      | -0.57 |
| 5 $\rightarrow$ 6   | 0.91        | 0.41      | 0.01  |
| 4 $\rightarrow$ 7   | -0.21       | -0.18     | -0.73 |
| 7 $\rightarrow$ 8   | 1.35        | 1.53      | 0.83  |

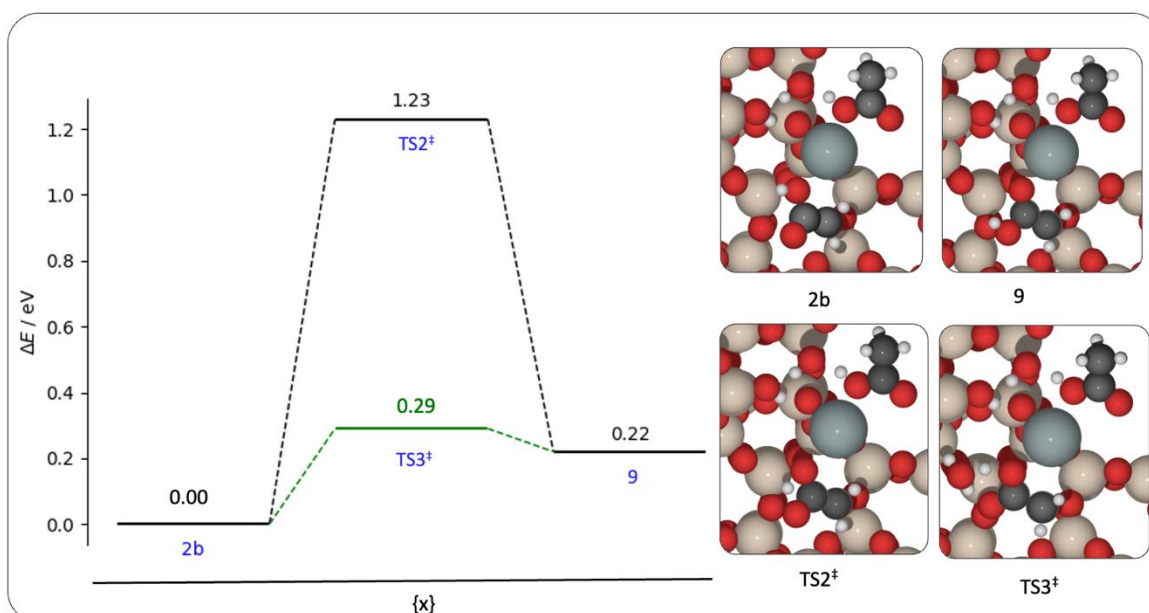

**Figure S7.** Graph of the reaction energies ( $\Delta E$ ) and kinetic barriers ( $E_{act}$ ) for conversion between 2b and 9, as calculated with periodic DFT. Where the green line indicates pathway mediated by water. Insets: visual representation of the structural intermediates, with structure numbers as labelled. The red, beige, white, black, and grey atoms represent O, Si, H, C, and Sn, respectively.

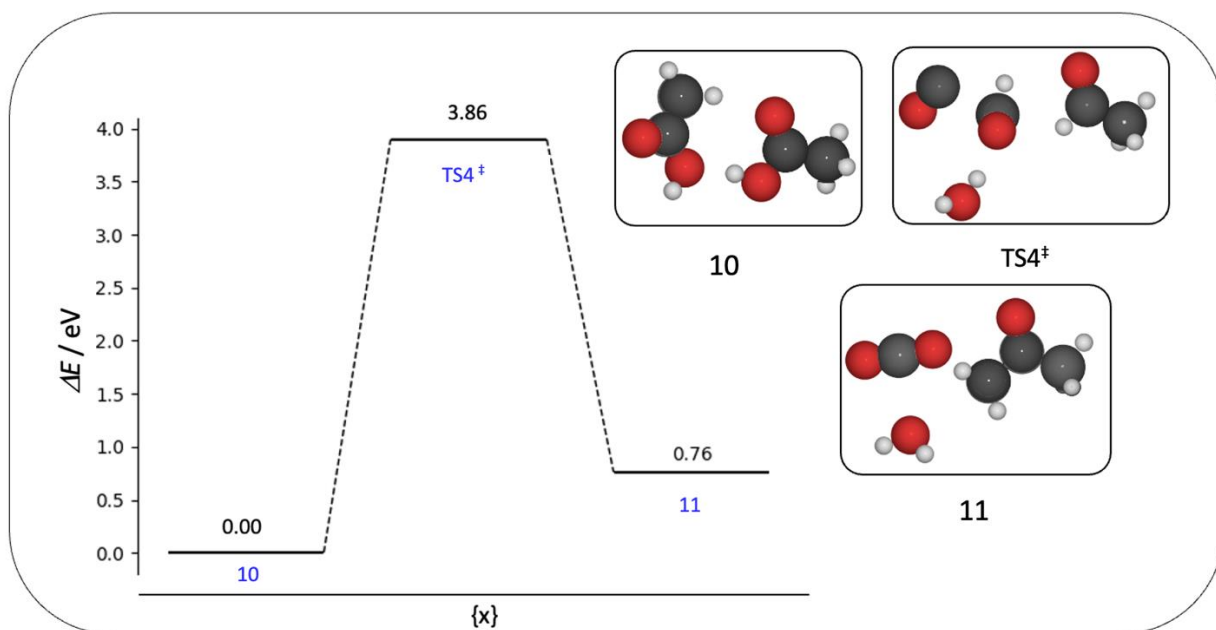

**Figure S8.** Graph of the reaction energies ( $\Delta E$ ) and kinetic barriers ( $E_{act}$ ) for ketonisation of acetic acid to acetone and  $\text{CO}_2$  and  $\text{H}_2\text{O}$  in the gas phase, as calculated with DFT (PBEsol+TS). Insets: visual representation of the structural intermediates, with structure numbers as labelled. The red, beige, white, black, and grey atoms represent O, Si, H, C, and Sn, respectively.

**Table S5:** Electron population and Mulliken charge for structures along the pathways for Sn oxidations via  $\text{H}_2$  abstraction: without  $\text{H}_2\text{O}$  ( $3 \rightarrow 4$ ) and with three  $\text{H}_2\text{O}$  molecules ( $5 \rightarrow 6$ ), and with  $\text{O}_2$ ,  $\text{Sn(II)} + \text{O}_2$  ( $9 \rightarrow \text{Sn(IV)} + \text{H}_2\text{O}_2$  (10)), as calculated with QM/MM (MP2).

| Structure | Electron Population | Mulliken Charge |
|-----------|---------------------|-----------------|
| 3         | 48.60               | 1.40            |
| 4         | 47.28               | 2.72            |
| 5         | 48.58               | 1.41            |
| 6         | 47.12               | 2.87            |
| 9         | 48.60               | 1.40            |
| 10        | 47.25               | 2.75            |

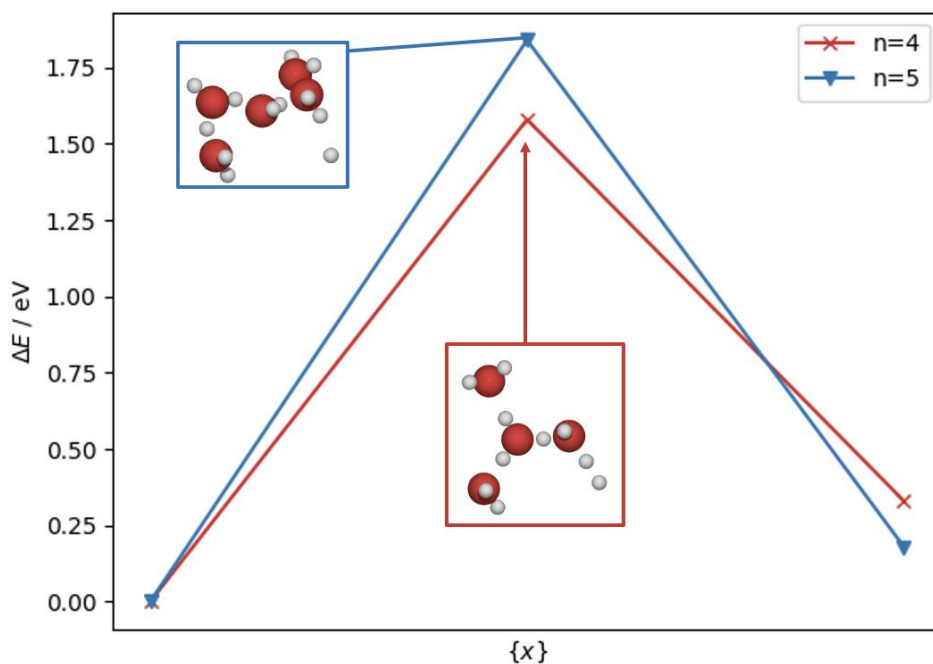

**Figure S9.** Graph of the reaction energies ( $\Delta E$ ) and kinetic barrier ( $E_{act}$ ), as calculated with periodic-DFT, for oxidation of Sn(II) to Sn(IV) depending on the number ( $n$ ) of H<sub>2</sub>O molecules. Insets: transition states for the conversion of Sn(II) to Sn(IV), with production H<sub>2</sub> mediated by H<sub>2</sub>O. Red and white atoms represent O and H, respectively.

## References

- (1) J. M. Newsam; M. M. J. Treacy; W. T. Koetsier; C. B. De Gruyter. Structural Characterization of Zeolite Beta. *Proc. R. Soc. Lond. A* **1988**, 420 (1859), 375–405.
- (2) Smart, B. A.; Griffiths, L. E.; Pulham, C. R.; Robertson, H. E.; Mitzel, N. W.; Rankin, D. W. H. Molecular Structure of Tin(II) Acetate as Determined in the Gas Phase by Electron Diffraction and Ab Initio Calculations. *J. Chem. Soc., Dalton Trans.* **1997**, No. 9, 1565–1570.
